# Supplementary material
Source: publisher figshare collection journal article supplement (https://frontiersin.figshare.com/ndownloader/files/28528764)
Supplement: Supplementary file 1 [file 28528764]

*Supplementary Material*

**Table 7a – 7t.** Information on the Identified 18 Programs Organized by the 20 Research Projects: Targeted Life Skills, Theoretical Framework of the Program and Further Program Contents, Targeted Population, as well as Results of Effectiveness (+ / - / 0)<sup>1</sup> on Life Skills Development and Other Program Objectives<sup>2</sup>

| a) Promoting Alternative Thinking Strategies (PATHS; Malti et al., 2011) |                                     |                                                      |                                                                                                   |                                                                           |                                                                                                                                            |
|--------------------------------------------------------------------------|-------------------------------------|------------------------------------------------------|---------------------------------------------------------------------------------------------------|---------------------------------------------------------------------------|--------------------------------------------------------------------------------------------------------------------------------------------|
| Targeted life skills                                                     |                                     |                                                      | Theoretical framework                                                                             | Duration of classroom-based program component, further program components | Grade (students' age) at program start, geographical location, sample sizes                                                                |
| Communication / interpersonal                                            | Decision-making / critical thinking | Coping and self-management                           |                                                                                                   |                                                                           |                                                                                                                                            |
| social relationships; rule understanding; positive social behavior       | problem solving                     | positive self-esteem; understanding of one's emotion | risk and resilience factors                                                                       | 1 year: 46 weekly sessions<br><br>Triple-P (Positive Parenting Program)   | 2 (7.5 years)<br><br>Switzerland<br><br>$n_{\text{PATHS only}} = 311$<br>$n_{\text{PATHS + Triple P}} = 254$<br>$n_{\text{control}} = 299$ |
| effectiveness regarding life skills                                      |                                     |                                                      | effectiveness regarding other objectives: Externalizing behavior                                  |                                                                           |                                                                                                                                            |
| prosocial behavior (0; teacher, parents, and students' ratings)          | --                                  | --                                                   | aggressive behavior (+), non-aggressive externalizing behavior (0), impulsivity (+/0), ADHD (+/0) |                                                                           |                                                                                                                                            |
| social-cognitive skills (0, students' rating)                            |                                     |                                                      | (mostly by teacher, parents', and students' ratings)                                              |                                                                           |                                                                                                                                            |

<sup>1</sup> (+) significantly more favorable values or changes in the experimental group than the control group; (–) significantly less favorable values or changes in the experimental group than the control group; (0) zero effect of the programs.

<sup>2</sup> This review only summarized results on effectiveness of the programs. Some studies provide more results, e.g., on the acceptance of the programs by teachers and/or students, or on the quality of implementation. Please refer to the studies for these results.

**b) Aussie Optimism Positive Thinking Skills Program (Rooney et al., 2013a, 2013b)**

| Targeted life skills                       |                                     |                                                                                                                                                                                                                                                              | Theoretical framework                                                                                                                                                                                                   | Duration of classroom-based program component, further program components | Grade (students' age) at program start, geographical location, sample sizes                          |
|--------------------------------------------|-------------------------------------|--------------------------------------------------------------------------------------------------------------------------------------------------------------------------------------------------------------------------------------------------------------|-------------------------------------------------------------------------------------------------------------------------------------------------------------------------------------------------------------------------|---------------------------------------------------------------------------|------------------------------------------------------------------------------------------------------|
| Communication / interpersonal              | Decision-making / critical thinking | Coping and self-management                                                                                                                                                                                                                                   |                                                                                                                                                                                                                         |                                                                           |                                                                                                      |
| --                                         | --                                  | Identifying thoughts and feelings; exploring the connection between thoughts, feelings, and behavior; learning to think more accurately and positively; relaxation and distraction; constructing a situational fear hierarchy; scheduling pleasurable events | cognitive-behavioral                                                                                                                                                                                                    | 1 year: 10 weekly sessions<br><br>--                                      | 4 (9-10 years)<br><br>Australia<br><br>$n_{\text{experimental}} = 467$<br>$n_{\text{control}} = 443$ |
| <b>effectiveness regarding life skills</b> |                                     |                                                                                                                                                                                                                                                              | <b>effectiveness regarding other objectives:</b> internalizing and externalizing disorders                                                                                                                              |                                                                           |                                                                                                      |
|                                            | --                                  | attribution (0)                                                                                                                                                                                                                                              | depression (0), anxiety (0), internalizing symptoms (0)<br><br>hyperactivity (+), conduct problems (0)<br><br>peer problems (0), prosocial behavior (0)<br><br>emotional difficulties (+/0), total difficulty score (+) |                                                                           |                                                                                                      |

## c) Think Smart curriculum (Johnson et al., 2009)

| Targeted life skills                       |                                                                    |                            | Theoretical framework                                                                                                                                                                  | Duration of classroom-based program component, further program components | Grade (students' age) at program start, geographical location, sample sizes             |
|--------------------------------------------|--------------------------------------------------------------------|----------------------------|----------------------------------------------------------------------------------------------------------------------------------------------------------------------------------------|---------------------------------------------------------------------------|-----------------------------------------------------------------------------------------|
| Communication / interpersonal              | Decision-making / critical thinking                                | Coping and self-management |                                                                                                                                                                                        |                                                                           |                                                                                         |
| refusal skills;<br>assertiveness skills    | knowledge on substances;<br>stereotypes and peer normative beliefs | self-management skills     | cognitive-behavioral; problem-solving model; informational education approach; cognitive-affective approach; bicultural competence / acculturation theory; risk and protective factors | 1 year: 15 sessions<br>--                                                 | 5 (N/A)<br><br>USA<br><br>$n_{\text{experimental}} = 245$<br>$n_{\text{control}} = 222$ |
| <b>effectiveness regarding life skills</b> |                                                                    |                            | <b>effectiveness regarding other objectives:</b> cultural identity; substance use                                                                                                      |                                                                           |                                                                                         |
| assertiveness (0)                          | normative beliefs (0)<br><br>knowledge (0)                         | --                         | cultural identity (0)<br><br>tobacco, alcohol, marijuana (30-day-use) (0)<br><br>use of other harmful legal products (+/0)                                                             |                                                                           |                                                                                         |

**d) Becoming independent 5+6 (Isensee et al., 2014)**

| Targeted life skills                                                                                         |                                                                                                                            |                                                                                                                           | Theoretical framework                                             | Duration of classroom-based program component, further program components    | Grade (students' age) at program start, geographical location, sample sizes                           |
|--------------------------------------------------------------------------------------------------------------|----------------------------------------------------------------------------------------------------------------------------|---------------------------------------------------------------------------------------------------------------------------|-------------------------------------------------------------------|------------------------------------------------------------------------------|-------------------------------------------------------------------------------------------------------|
| Communication / interpersonal                                                                                | Decision-making / critical thinking                                                                                        | Coping and self-management                                                                                                |                                                                   |                                                                              |                                                                                                       |
| communication skills; interpersonal relationship skills; empathy; ability to work in a group; refusal skills | problem-solving; critical thinking; decision-making; knowledge on substances; perceived norms; strategies of advertisement | Resistance self-efficacy / coping with pressure to use substances; self-awareness; coping with stress, emotions, problems | social influence theory                                           | 2 years: 14 units + 2 workshops, evenly distributed over the years<br><br>-- | 5 (10.37 years)<br><br>Germany<br><br>$n_{\text{experimental}} = 1179$<br>$n_{\text{control}} = 1334$ |
| effectiveness regarding life skills                                                                          |                                                                                                                            |                                                                                                                           | effectiveness regarding other objectives: Substance use and abuse |                                                                              |                                                                                                       |
| --                                                                                                           | attitudes (+)<br><br>knowledge (+)<br><br>normative expectations (0)                                                       | refusal self-efficacy (0)                                                                                                 | tobacco (incidence) (+)<br><br>current frequency (0)              |                                                                              |                                                                                                       |

**e) Information + Psychosocial Competence = Protection (IPSY; Wenzel et al., 2009; Spaeth et al., 2010; Weichold & Blumenthal, 2016)**

| Targeted life skills                                |                                                                                                      |                                                                                      | Theoretical framework                                                                                                                                                                                                                                                                        | Duration of classroom-based program component, further program components | Grade (students' age) at program start, geographical location, sample sizes                            |
|-----------------------------------------------------|------------------------------------------------------------------------------------------------------|--------------------------------------------------------------------------------------|----------------------------------------------------------------------------------------------------------------------------------------------------------------------------------------------------------------------------------------------------------------------------------------------|---------------------------------------------------------------------------|--------------------------------------------------------------------------------------------------------|
| Communication / interpersonal                       | Decision-making / critical thinking                                                                  | Coping and self-management                                                           |                                                                                                                                                                                                                                                                                              |                                                                           |                                                                                                        |
| Assertiveness; communication skills; refusal skills | knowledge on substances; reflection on attitudes and values; advertising strategies; problem solving | Resistance to offers; self-awareness; stress, anxiety, and problem coping strategies | social influence theory; problem behavior theory; developmental tasks; theory of planned behavior; risk and protective factors                                                                                                                                                               | 3 years: 15 + 7 + 7 sessions<br>--                                        | 5 (10.5 years)<br>Germany<br>$n_{\text{experimental}} \approx 533$<br>$n_{\text{control}} \approx 419$ |
| <b>effectiveness regarding life skills</b>          |                                                                                                      |                                                                                      | <b>effectiveness regarding other objectives:</b> School bonding; substance use and misuse                                                                                                                                                                                                    |                                                                           |                                                                                                        |
| --                                                  | --                                                                                                   | --                                                                                   | school bonding, 2-years follow-up: (+)<br><br>intention to drink, 2-years follow-up: (+); 30-day use alcohol, 2-years follow-up (+), 4-years follow-up (0)<br><br>30-day use tobacco: 2-years follow-up (+), 4-years follow-up (+)<br><br>proneness to illicit drugs, 4-years follow-up: (+) |                                                                           |                                                                                                        |

**f) Information + Psychosocial Competence = Protection (IPSY; Giannotta & Weichold, 2016)**

| Targeted life skills                       |                                           |                                                                         | Theoretical framework                                                        | Duration of classroom-based program component, further program components | Grade (students' age) at program start, geographical location, sample sizes                                                                                                                                                      |
|--------------------------------------------|-------------------------------------------|-------------------------------------------------------------------------|------------------------------------------------------------------------------|---------------------------------------------------------------------------|----------------------------------------------------------------------------------------------------------------------------------------------------------------------------------------------------------------------------------|
| Communication / interpersonal              | Decision-making / critical thinking       | Coping and self-management                                              |                                                                              |                                                                           |                                                                                                                                                                                                                                  |
| communication skills; assertiveness        | knowledge on substance and on advertising | resistance skills; self-awareness; stress and problem coping strategies | social influence theory; problem behavior theory; developmental tasks        | 3 years: 15 + 1 + 1 sessions<br>--                                        | 5 (10.5 years)<br><br>Germany<br><br>$n_{\text{experimental}} \approx 645$<br>$n_{\text{control}} \approx 486$<br><br>6 (11.1 years)<br><br>Italy<br><br>$n_{\text{experimental}} \approx 72$<br>$n_{\text{control}} \approx 87$ |
| <b>effectiveness regarding life skills</b> |                                           |                                                                         | <b>effectiveness regarding other objectives:</b> School bonding; alcohol use |                                                                           |                                                                                                                                                                                                                                  |
| Assertiveness (+/0)                        | knowledge on alcohol (0)                  | resistance to peer pressure (+/0)                                       | school involvement (+/0)                                                     |                                                                           |                                                                                                                                                                                                                                  |
| communication rules (0)                    | problem-solving (0)                       | self-esteem (0)                                                         | appreciation from others (0)                                                 |                                                                           |                                                                                                                                                                                                                                  |
|                                            |                                           |                                                                         | 30-day frequency of alcohol (+/0)                                            |                                                                           |                                                                                                                                                                                                                                  |
|                                            |                                           |                                                                         | intention to use alcohol next 12 months (+/0)                                |                                                                           |                                                                                                                                                                                                                                  |

## g) "Fit and Strong for Life" + "Lions Quest" (Menrath et al., 2012)

| Targeted life skills                                                 |                                                                              |                                                                                                   | Theoretical framework                                                          | Duration of classroom-based program component, further program components | Grade (students' age) at program start, geographical location, sample sizes  |
|----------------------------------------------------------------------|------------------------------------------------------------------------------|---------------------------------------------------------------------------------------------------|--------------------------------------------------------------------------------|---------------------------------------------------------------------------|------------------------------------------------------------------------------|
| Communication / interpersonal                                        | Decision-making / critical thinking                                          | Coping and self-management                                                                        |                                                                                |                                                                           |                                                                              |
| Fit and Strong for Life: empathy; communication skills               | Fit and Strong for Life: critical thinking; problem solving; decision-making | Fit and Strong for Life: resistance skills; self-esteem; coping with stress and negative emotions | social-influence approach                                                      | N/A                                                                       | 5 or 6 (N/A)                                                                 |
| Lions Quest: behavior in classes/groups; peer / family relationships | Lions Quest: decision-making                                                 | Lions Quest: self-esteem; coping with emotions; self-efficacy                                     |                                                                                | --                                                                        | Germany<br><br>$n_{\text{experimental}} = 782$<br>$n_{\text{control}} = 588$ |
| effectiveness regarding life skills                                  |                                                                              |                                                                                                   | effectiveness regarding other objectives: Substance use, subjective health     |                                                                           |                                                                              |
| <i>Teacher's rating:</i>                                             | --                                                                           | <i>Self-report:</i>                                                                               | 30-day prevalence smoking (+), frequency smoking (+/0)                         |                                                                           |                                                                              |
| assertiveness (+)                                                    |                                                                              | individual resources / self-efficacy (0)                                                          | 30-day prevalence alcohol (+/0)                                                |                                                                           |                                                                              |
| tolerance (+)                                                        |                                                                              |                                                                                                   | Quality of life index (0)                                                      |                                                                           |                                                                              |
| autonomy (+)                                                         |                                                                              |                                                                                                   | physical well-being (0), psychological well-being (0), life satisfaction (+/0) |                                                                           |                                                                              |
| communication (+)                                                    |                                                                              |                                                                                                   | parent relations and autonomy (0), social support and peers (-)                |                                                                           |                                                                              |
| cooperation (0)                                                      |                                                                              |                                                                                                   | school environment (+/0)                                                       |                                                                           |                                                                              |
| <i>Self-report:</i>                                                  |                                                                              |                                                                                                   | 0 strengths and difficulties (0)                                               |                                                                           |                                                                              |
| social competences (0)                                               |                                                                              |                                                                                                   |                                                                                |                                                                           |                                                                              |



## h) Life Skills Training (LST; Velasco et al., 2017)

| Targeted life skills                       |                                               |                                                                                                                                           | Theoretical framework                                                                                                                                                    | Duration of classroom-based program component, further program components | Grade (students' age) at program start, geographical location, sample sizes        |
|--------------------------------------------|-----------------------------------------------|-------------------------------------------------------------------------------------------------------------------------------------------|--------------------------------------------------------------------------------------------------------------------------------------------------------------------------|---------------------------------------------------------------------------|------------------------------------------------------------------------------------|
| Communication / interpersonal              | Decision-making / critical thinking           | Coping and self-management                                                                                                                |                                                                                                                                                                          |                                                                           |                                                                                    |
| social competence; assertiveness           | Attitudes; decision-making; critical thinking | Resistance skills; reduce susceptibility to negative influences; decrease motivation to engage in substance use; anxiety reduction skills | social learning theory; problem behavior theory; developmental tasks; risk and protective factors; positive youth development / general competence enhancement framework | 3 years: 15 + 10 + 9 sessions<br>--                                       | 6 (11.1)<br>Italy<br>$n_{\text{experimental}} = 831$<br>$n_{\text{control}} = 755$ |
| <b>effectiveness regarding life skills</b> |                                               |                                                                                                                                           | <b>effectiveness regarding other objectives:</b> Substance use; psychosocial outcomes                                                                                    |                                                                           |                                                                                    |
| Assertiveness (-/+)                        | knowledge (+)                                 | skill awareness (+)                                                                                                                       | anxiety (+)                                                                                                                                                              |                                                                           |                                                                                    |
|                                            | attitudes (0/+)                               |                                                                                                                                           | distress (+)                                                                                                                                                             |                                                                           |                                                                                    |
|                                            | normative beliefs (+)                         |                                                                                                                                           | well-being (0)                                                                                                                                                           |                                                                           |                                                                                    |
|                                            | decision-making (0)                           |                                                                                                                                           | substance use initiation (0)                                                                                                                                             |                                                                           |                                                                                    |
|                                            | resist advertising (0)                        |                                                                                                                                           | booster frequency of substance use (0/+)                                                                                                                                 |                                                                           |                                                                                    |
|                                            | risk-taking (0)                               |                                                                                                                                           |                                                                                                                                                                          |                                                                           |                                                                                    |

## i) Project ALERT (Clark et al., 2010)

| Targeted life skills                |                                                                                     |                              | Theoretical framework                                                                 | Duration of classroom-based program component, further program components | Grade (students' age) at program start, geographical location, sample sizes                                                                                  |
|-------------------------------------|-------------------------------------------------------------------------------------|------------------------------|---------------------------------------------------------------------------------------|---------------------------------------------------------------------------|--------------------------------------------------------------------------------------------------------------------------------------------------------------|
| Communication / interpersonal       | Decision-making / critical thinking                                                 | Coping and self-management   |                                                                                       |                                                                           |                                                                                                                                                              |
|                                     | outcome expectancies; normative beliefs; intentions to use substances in the future | resistance self-efficacy     | health belief model; self-efficacy theory of behavior change; health promotion models | 2 years: 11 + 3 weekly sessions<br>--                                     | 6 (N/A)<br>USA<br>$N_{\text{Total}} = 4042$<br>(34 schools were randomly assigned to intervention or control group, distribution on EG and CG not available) |
| effectiveness regarding life skills |                                                                                     |                              | effectiveness regarding other objectives: Substance use                               |                                                                           |                                                                                                                                                              |
| --                                  | beliefs on consequences (0)<br><br>normative beliefs (0)                            | resistance self-efficacy (0) | Intention of substance use (0/-)                                                      |                                                                           |                                                                                                                                                              |

j) Aussie Optimism Program (AOP; Roberts et al., 2011; Roberts et al., 2018)

| Targeted life skills                                                                          |                                                                                             |                                                                                                                                                                                    | Theoretical framework                                                                                                                                      | Duration of classroom-based program component, further program components | Grade (students' age) at program start, geographical location, sample sizes                                                                                                                                                                          |
|-----------------------------------------------------------------------------------------------|---------------------------------------------------------------------------------------------|------------------------------------------------------------------------------------------------------------------------------------------------------------------------------------|------------------------------------------------------------------------------------------------------------------------------------------------------------|---------------------------------------------------------------------------|------------------------------------------------------------------------------------------------------------------------------------------------------------------------------------------------------------------------------------------------------|
| Communication / interpersonal                                                                 | Decision-making / critical thinking                                                         | Coping and self-management                                                                                                                                                         |                                                                                                                                                            |                                                                           |                                                                                                                                                                                                                                                      |
| communication skills; assertiveness, negotiation; social support networks; friends and family | decision making; social problem solving, strategies for dealing with interpersonal conflict | Stress coping skills; identifying and linking feelings, thoughts, and behaviors; thinking styles; attributions; decatastrophising; looking for evidence; pleasant event scheduling | cognitive-behavioral                                                                                                                                       | 2 years: 10 weekly sessions / year<br><br>AOP for Families and Parents    | 6 (11.05 years)<br><br>Australia<br><br>$n_{\text{teacher-training}} = 693$ (in 2011) / 809 (in 2018)<br>$n_{\text{teacher-training} + \text{coaching}} = 468$ (in 2011) / 746 (in 2018)<br><br>$n_{\text{control}} = 533$ (in 2011) / 601 (in 2018) |
| <b>effectiveness regarding life skills</b>                                                    |                                                                                             |                                                                                                                                                                                    | <b>effectiveness regarding other objectives:</b> Internalizing problems, suicidal behavior, substance abuse (+ if teachers received training and coaching) |                                                                           |                                                                                                                                                                                                                                                      |
| prosocial behavior (0)                                                                        | --                                                                                          | --                                                                                                                                                                                 | depression (0)                                                                                                                                             |                                                                           |                                                                                                                                                                                                                                                      |
|                                                                                               |                                                                                             |                                                                                                                                                                                    | anxiety (0)                                                                                                                                                |                                                                           |                                                                                                                                                                                                                                                      |
|                                                                                               |                                                                                             |                                                                                                                                                                                    | difficulty score (0)                                                                                                                                       |                                                                           |                                                                                                                                                                                                                                                      |
|                                                                                               |                                                                                             |                                                                                                                                                                                    | 4-weeks-prevalence of alcohol / tobacco (+)                                                                                                                |                                                                           |                                                                                                                                                                                                                                                      |
|                                                                                               |                                                                                             |                                                                                                                                                                                    | incidence of suicidal ideation (+)                                                                                                                         |                                                                           |                                                                                                                                                                                                                                                      |

**k) PROmoting School–community–university Partnerships to Enhance Resilience (PROSPER), with: Life Skills Training (LST), Project ALERT, or All stars (Spoth et al., 2007; Spoth et al., 2011; Osgood et al., 2013; Spoth et al., 2013a, 2013b; Spoth et al., 2017)**

| Targeted life skills                         |                                                                                                       |                                              | Theoretical framework                                                                                                                                                                                  | Duration of classroom-based program component, further program components     | Grade (students' age) at program start, geographical location, sample sizes        |
|----------------------------------------------|-------------------------------------------------------------------------------------------------------|----------------------------------------------|--------------------------------------------------------------------------------------------------------------------------------------------------------------------------------------------------------|-------------------------------------------------------------------------------|------------------------------------------------------------------------------------|
| Communication / interpersonal                | Decision-making / critical thinking                                                                   | Coping and self-management                   |                                                                                                                                                                                                        |                                                                               |                                                                                    |
| LST: prosocial skills; general social skills | LST: strategies for avoiding substance use                                                            | LST: peer resistance skills; self-management | LST: social learning theory; problem behavior theory                                                                                                                                                   | 1 year: 11-15 sessions                                                        | 7 (11.9)                                                                           |
| Project ALERT:                               | Project ALERT: normative beliefs; knowledge on substances; attitudes of peers, parents, media, others | Project ALERT: resistance self-efficacy      | Project ALERT: social influence theory                                                                                                                                                                 | Strengthening Families Program for parents and youth 10-14 years (in grade 6) | USA<br>$n_{\text{experimental}} \approx 5515$<br>$n_{\text{control}} \approx 5334$ |
| --                                           |                                                                                                       |                                              |                                                                                                                                                                                                        |                                                                               |                                                                                    |
| All stars:                                   |                                                                                                       | All Stars:                                   |                                                                                                                                                                                                        |                                                                               |                                                                                    |
| --                                           | All Stars: perceptions of substance use and violence; normative beliefs; personal commitment          | --                                           | All Stars: social learning theory; problem behavior theory                                                                                                                                             |                                                                               |                                                                                    |
| <b>effectiveness regarding life skills</b>   |                                                                                                       |                                              | <b>effectiveness regarding other objectives: substance use</b>                                                                                                                                         |                                                                               |                                                                                    |
| --                                           | --                                                                                                    | --                                           | Grade 9: initiation legal / illicit substance use (+), past-month/-years use (+/0), antisocial influence network / orientation (+)                                                                     |                                                                               |                                                                                    |
|                                              |                                                                                                       |                                              | grade 10: new users' lifetime initiation / frequency for diverse substances (+), already users' past month alcohol / tobacco use (0), past-year drunkenness (+/0), past-year illicit substance use (+) |                                                                               |                                                                                    |
|                                              |                                                                                                       |                                              | Grade 11/12 / age 19: initiation illicit substance use (+), diverse use past-month/-year (0/+)                                                                                                         |                                                                               |                                                                                    |

---

age 21-22: lifetime misuse of illicit drugs / opioid (+),

age 25: lifetime misuse of illicit drugs/opioid at (0)

## I) Life Skills Training (LST; Spoth et al., 2008; Spoth et al., 2014; Trudeau et al., 2016)

| Targeted life skills                                        |                                                                                                                                                                                           |                                                                                                                                   | Theoretical framework                                                                                                                                                                                                                  | Duration of classroom-based program component, further program components                                                      | Grade (students' age) at program start, geographical location, sample sizes                        |
|-------------------------------------------------------------|-------------------------------------------------------------------------------------------------------------------------------------------------------------------------------------------|-----------------------------------------------------------------------------------------------------------------------------------|----------------------------------------------------------------------------------------------------------------------------------------------------------------------------------------------------------------------------------------|--------------------------------------------------------------------------------------------------------------------------------|----------------------------------------------------------------------------------------------------|
| Communication / interpersonal                               | Decision-making / critical thinking                                                                                                                                                       | Coping and self-management                                                                                                        |                                                                                                                                                                                                                                        |                                                                                                                                |                                                                                                    |
| communication skills; assertiveness; boy-girl relationships | Knowledge on substances; substance use norms; social acceptability; avoidance of substance use; decision-making; social pressures, recognizing persuasive strategies, conflict resolution | social resistance; self-management, formation of self-image; recognize anxiety-inducing situations; coping with anxiety and anger | social learning theory; problem behavior theory                                                                                                                                                                                        | 2 years: 15 + 5 sessions (+partly some sessions in grade 11)<br><br>Strengthening Families Program for Parents and Youth 10–14 | 7 (12.3 years)<br>USA<br><br>$n_{LST-only} = 428$<br>$n_{LST+family} = 450$<br>$n_{control} = 347$ |
| effectiveness regarding life skills                         |                                                                                                                                                                                           |                                                                                                                                   | effectiveness regarding other objectives: Substance use and misuse; depression                                                                                                                                                         |                                                                                                                                |                                                                                                    |
| --                                                          | --                                                                                                                                                                                        | --                                                                                                                                | Grade 12: initiation tobacco (+), alcohol, marijuana (+/0)<br><br>Age 19-22: initiation legal, illicit substance use (+), frequencies legal, illicit substance use (+)<br><br>depression symptoms (+)<br><br>relationship problems (+) |                                                                                                                                |                                                                                                    |

m) Finnish ESFA programme (Vartiainen et al., 2007)

| Targeted life skills                |                                     |                            | Theoretical framework                                                                                                      | Duration of classroom-based program component, further program components                                                                             | Grade (students' age) at program start, geographical location, sample sizes                       |
|-------------------------------------|-------------------------------------|----------------------------|----------------------------------------------------------------------------------------------------------------------------|-------------------------------------------------------------------------------------------------------------------------------------------------------|---------------------------------------------------------------------------------------------------|
| Communication / interpersonal       | Decision-making / critical thinking | Coping and self-management |                                                                                                                            |                                                                                                                                                       |                                                                                                   |
| Refusal skills                      | Knowledge on substance              | --                         | attitude-social influence-self efficacy model; integrated change model; social learning theory; theory of planned behavior | 3 years: 5 + 5 + 4 sessions<br><br>Quit-and-Win contest for parents / school personnel; involving parish confirmation camps leaders and school nurses | 7 (15 years)<br><br>Finland<br><br>$n_{\text{experimental}} = 1821$<br>$n_{\text{control}} = 924$ |
| effectiveness regarding life skills |                                     |                            | effectiveness regarding other objectives: Smoking                                                                          |                                                                                                                                                       |                                                                                                   |
| --                                  | --                                  | --                         | Initiation of smoking (0/+)                                                                                                |                                                                                                                                                       |                                                                                                   |
|                                     |                                     |                            | frequency (0)                                                                                                              |                                                                                                                                                       |                                                                                                   |
|                                     |                                     |                            | increase of frequency (0)                                                                                                  |                                                                                                                                                       |                                                                                                   |
|                                     |                                     |                            | cessation (0)                                                                                                              |                                                                                                                                                       |                                                                                                   |

## n) New PASE program (Ariza et al., 2008)

| Targeted life skills                |                                     |                            | Theoretical framework                             | Duration of classroom-based program component, further program components                                                                   | Grade (students' age) at program start, geographical location, sample sizes                      |
|-------------------------------------|-------------------------------------|----------------------------|---------------------------------------------------|---------------------------------------------------------------------------------------------------------------------------------------------|--------------------------------------------------------------------------------------------------|
| Communication / interpersonal       | Decision-making / critical thinking | Coping and self-management |                                                   |                                                                                                                                             |                                                                                                  |
| Refusal skills                      | social influences; decision making  |                            | social influence theory                           | 3 years: 6 + 6 + 5 sessions<br><br>smoke-free school policy actions; parental intervention; community measures: leisure time intermediaries | 7 (12.5 years)<br><br>Spain<br><br>$n_{\text{experimental}} = 690$<br>$n_{\text{control}} = 603$ |
| effectiveness regarding life skills |                                     |                            | effectiveness regarding other objectives: Smoking |                                                                                                                                             |                                                                                                  |
| --                                  | --                                  | --                         | Prevalence regular tobacco use (+)                |                                                                                                                                             |                                                                                                  |



**o) Unplugged (Faggiano et al., 2010)**

| Targeted life skills                                                 |                                                                                                               |                            | Theoretical framework                                                                                             | Duration of classroom-based program component, further program components                                            | Grade (students' age) at program start, geographical location, sample sizes                                                                                                      |
|----------------------------------------------------------------------|---------------------------------------------------------------------------------------------------------------|----------------------------|-------------------------------------------------------------------------------------------------------------------|----------------------------------------------------------------------------------------------------------------------|----------------------------------------------------------------------------------------------------------------------------------------------------------------------------------|
| Communication / interpersonal                                        | Decision-making / critical thinking                                                                           | Coping and self-management |                                                                                                                   |                                                                                                                      |                                                                                                                                                                                  |
| peer-group attachment, group approach; refusal skills; assertiveness | Knowledge on substances; attitudes; normative beliefs; peer-group allowance and expectancies; decision-making | Coping strategies          | social influence approach                                                                                         | 1 year: 12 weekly sessions<br><br>Curriculum alone vs. activities involving peers (peer arm) or parents (parent arm) | ≥7 (≥12 years)<br><br>Austria, Belgium, Germany, Greece, Italy, Spain, Sweden<br><br>$n_{basic} = 956$ ,<br>$n_{+parent} = 972$ ,<br>$n_{+peer} = 883$ ,<br>$n_{control} = 2730$ |
| <b>effectiveness regarding life skills</b>                           |                                                                                                               |                            | <b>effectiveness regarding other objectives:</b> Substance use                                                    |                                                                                                                      |                                                                                                                                                                                  |
| --                                                                   | --                                                                                                            | --                         | remain / get non-users (+)<br><br>frequency of tobacco use (0)<br><br>drunkenness (+/0)<br><br>cannabis use (+/0) |                                                                                                                      |                                                                                                                                                                                  |

## p) POtsdam Prevention at Schools (POPS; Warschburger &amp; Zitzmann, 2018)

| Targeted life skills                                 |                                                                                                                                                            |                                                                                                                                                                                                                                                | Theoretical framework                                                                                                         | Duration of classroom-based program component, further program components | Grade (students' age) at program start, geographical location, sample sizes                                              |
|------------------------------------------------------|------------------------------------------------------------------------------------------------------------------------------------------------------------|------------------------------------------------------------------------------------------------------------------------------------------------------------------------------------------------------------------------------------------------|-------------------------------------------------------------------------------------------------------------------------------|---------------------------------------------------------------------------|--------------------------------------------------------------------------------------------------------------------------|
| Communication / interpersonal                        | Decision-making / critical thinking                                                                                                                        | Coping and self-management                                                                                                                                                                                                                     |                                                                                                                               |                                                                           |                                                                                                                          |
| establishment of an "Anti-Teasing-Classroom Climate" | reflecting media techniques / artificial beauties; own eating habits; myths about eating and dieting; problem-solving; motives and consequences of teasing | general and appearance-related / teasing stress coping; diversity and multidimensionality of attractiveness and self-concept; self-esteem, effects of feedback; general well-being and body acceptance; acceptance of strengths and weaknesses | tripartite influence model of body image and eating disturbance; risk factors                                                 | 1 year: 9 weekly sessions<br>--                                           | 7-9 (mean age 13 years, range 11-16)<br><br>Germany<br><br>$n_{\text{experimental}} = 343$<br>$n_{\text{control}} = 429$ |
| <b>effectiveness regarding life skills</b>           |                                                                                                                                                            |                                                                                                                                                                                                                                                | <b>effectiveness regarding other objectives:</b> eating disorders, internalization                                            |                                                                           |                                                                                                                          |
| perception of teasing (0)                            | attitudes towards dietary (+)<br><br>media pressure (+), perfectionism (+), social comparison (+)                                                          | --                                                                                                                                                                                                                                             | bulimic (0), drive for thinness (0), body dissatisfaction (0), feeling bad if not doing sports (+)<br><br>internalization (0) |                                                                           |                                                                                                                          |

**q) Drug Education in Victorian Schools (DEVS; Midford et al., 2018)**

| Targeted life skills                                                                                  |                                                                                                                                                                                                                                                          |                                                                 | Theoretical framework                                                                    | Duration of classroom-based program component, further program components | Grade (students' age) at program start, geographical location, sample sizes                |
|-------------------------------------------------------------------------------------------------------|----------------------------------------------------------------------------------------------------------------------------------------------------------------------------------------------------------------------------------------------------------|-----------------------------------------------------------------|------------------------------------------------------------------------------------------|---------------------------------------------------------------------------|--------------------------------------------------------------------------------------------|
| Communication / interpersonal                                                                         | Decision-making / critical thinking                                                                                                                                                                                                                      | Coping and self-management                                      |                                                                                          |                                                                           |                                                                                            |
| Communication; providing peer support; assertion skills; refusal skills; tactics for peer negotiation | knowledge on substances, mental health, violence, antisocial behavior, sexual vulnerability; normative beliefs; gender norms and differences; assessing risk; strategies to avoid or minimize harm; social and media influences; values; decision making | worries, concerns; positive self-talk; help seeking with adults | N/A (study results)                                                                      | 2 years: 10 + 8 sessions<br>--                                            | 8 (13 years)<br>Australia<br>$n_{\text{experimental}} = 621$<br>$n_{\text{control}} = 345$ |
| <b>effectiveness regarding life skills</b>                                                            |                                                                                                                                                                                                                                                          |                                                                 | <b>effectiveness regarding other objectives:</b> Alcohol use and misuse, associated harm |                                                                           |                                                                                            |
| --                                                                                                    | Knowledge (+)<br>Attitudes (0)                                                                                                                                                                                                                           | talking to parents (0)                                          | underage initiation (0)<br>alcohol use (+)<br>harms (+)                                  |                                                                           |                                                                                            |

## r) KEEP LEFT (harm minimization) and Life Skills Training (LST; Resnicow et al., 2008)

| Targeted life skills                       |                                                                                                                                                             |                                                            | Theoretical framework                                                        | Duration of classroom-based program component, further program components | Grade (students' age) at program start, geographical location, sample sizes                                                                         |
|--------------------------------------------|-------------------------------------------------------------------------------------------------------------------------------------------------------------|------------------------------------------------------------|------------------------------------------------------------------------------|---------------------------------------------------------------------------|-----------------------------------------------------------------------------------------------------------------------------------------------------|
| Communication / interpersonal              | Decision-making / critical thinking                                                                                                                         | Coping and self-management                                 |                                                                              |                                                                           |                                                                                                                                                     |
| LST: assertive communication               | LST: decision making<br><br>KEEP LEFT: decision-making; strategies for limiting frequency / intensity of smoking; analyzing the context and cues of smoking | LST: resisting peer pressure; stress and affect management | LST: social influence theory; social competence theory<br><br>KEEP LEFT: N/A | 2 years: 8 + 8 sessions<br><br>--                                         | 8 (14.4 years)<br><br>South Africa<br><br>$n_{\text{harm-Minimization}} = 1751$ ,<br>$n_{\text{Life-skills}} = 1529$<br>$n_{\text{control}} = 1404$ |
| <b>effectiveness regarding life skills</b> |                                                                                                                                                             |                                                            | <b>effectiveness regarding other objectives:</b> Smoking, harm minimization  |                                                                           |                                                                                                                                                     |
| refusal skills (0)                         | attitudes (0)                                                                                                                                               | --                                                         | initiation of smoking (0)                                                    |                                                                           |                                                                                                                                                     |
|                                            |                                                                                                                                                             |                                                            | frequency (0)                                                                |                                                                           |                                                                                                                                                     |
|                                            |                                                                                                                                                             |                                                            | perceived harms (0)                                                          |                                                                           |                                                                                                                                                     |

**s) TimeWise (Taking Charge of Leisure Time) and HealthWise (Smith et al., 2008)**

| Targeted life skills                       |                                                                                                         |                                              | Theoretical framework                                                                                                                                                                                               | Duration of classroom-based program component, further program components | Grade (students' age) at program start, geographical location, sample sizes                          |
|--------------------------------------------|---------------------------------------------------------------------------------------------------------|----------------------------------------------|---------------------------------------------------------------------------------------------------------------------------------------------------------------------------------------------------------------------|---------------------------------------------------------------------------|------------------------------------------------------------------------------------------------------|
| Communication / interpersonal              | Decision-making / critical thinking                                                                     | Coping and self-management                   |                                                                                                                                                                                                                     |                                                                           |                                                                                                      |
| relationships                              | Knowledge on substances and condom use; attitudes; making healthy choices in free time; decision making | anxiety and anger management; self-awareness | prevention theories on multi-directional influences and developmental systems; developmental psychology; leisure studies                                                                                            | 2 years: 12 + 6 sessions<br>--                                            | 8 (14.0 years)<br>South Africa<br><br><i>n</i> Total = 1350, distribution on EG and CG not available |
| <b>effectiveness regarding life skills</b> |                                                                                                         |                                              | <b>effectiveness regarding other objectives:</b> HIV/AIDS, other sexually transmitted illnesses; substance use                                                                                                      |                                                                           |                                                                                                      |
| --                                         | knowledge of condom use (+)                                                                             | --                                           | sexual intercourse (0)<br><br>condom use / self-efficacy in use (+)<br><br>initiation of substance use (0)<br><br>frequency tobacco use (+/0)<br><br>frequency alcohol use (+/0)<br><br>frequency marijuana use (0) |                                                                           |                                                                                                      |

## t) LARS &amp; LISA (Wahl et al., 2014)

| Targeted life skills                    |                                     |                                                                                              | Theoretical framework                                            | Duration of classroom-based program component, further program components | Grade (students' age) at program start, geographical location, sample sizes                        |
|-----------------------------------------|-------------------------------------|----------------------------------------------------------------------------------------------|------------------------------------------------------------------|---------------------------------------------------------------------------|----------------------------------------------------------------------------------------------------|
| Communication / interpersonal           | Decision-making / critical thinking | Coping and self-management                                                                   |                                                                  |                                                                           |                                                                                                    |
| Assertiveness; social competence skills | --                                  | linking cognitions, emotions, and behaviors; identifying and challenging negative cognitions | cognitive-behavioral theory; social information processing model | 1 year: 10 weekly sessions.<br>--                                         | 8 ( $\geq 13$ years)<br>Germany<br>$n_{\text{experimental}} = 155$ ,<br>$n_{\text{control}} = 184$ |
| effectiveness regarding life skills     |                                     |                                                                                              | effectiveness regarding other objectives: Depression             |                                                                           |                                                                                                    |
| --                                      | --                                  | --                                                                                           | depressive symptoms (0)                                          |                                                                           |                                                                                                    |
